# Supplementary material for: Synchrotron macro ATR-FTIR microspectroscopic analysis of silica nanoparticle-embedded polyester coated steel surfaces subjected to prolonged UV and humidity exposure
Source: PubMed Central journal article supplement (PMC5734741; doi:10.1371/journal.pone.0188345), 2017-12-18
Supplement: pone.0188345.s001.pdf [file pone.0188345.s001.pdf]

Rainfall (mm)

Temperature (°C)

Humidity (%)

UV Index

**Tropical climate (Singapore)**

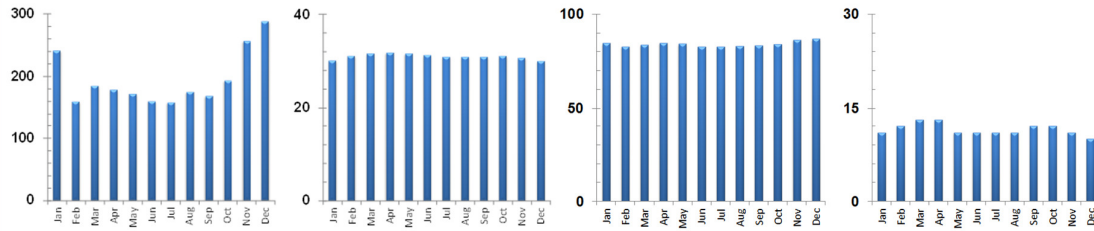

**Sub-tropical climate (Rockhampton, Queensland, Australia)**

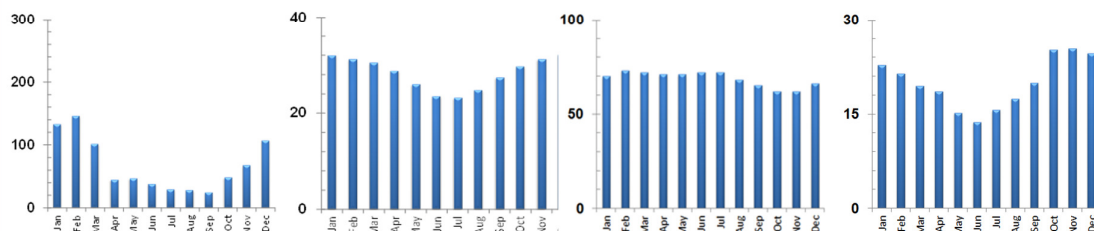

**S1 Fig. Monthly climate data of tropical (Singapore) and sub-tropical (Rockhampton, Queensland, Australia) regions. Data were obtained from Meteorological Service Singapore (<http://www.weather.gov.sg>) and Bureau of Meteorology, Australian Government (<http://www.bom.gov.au>).**
