# Supplementary material for: Synchrotron macro ATR-FTIR microspectroscopic analysis of silica nanoparticle-embedded polyester coated steel surfaces subjected to prolonged UV and humidity exposure
Source: PubMed Central journal article supplement (PMC5734741; doi:10.1371/journal.pone.0188345), 2017-12-18
Supplement: pone.0188345.s002.pdf [file pone.0188345.s002.pdf]

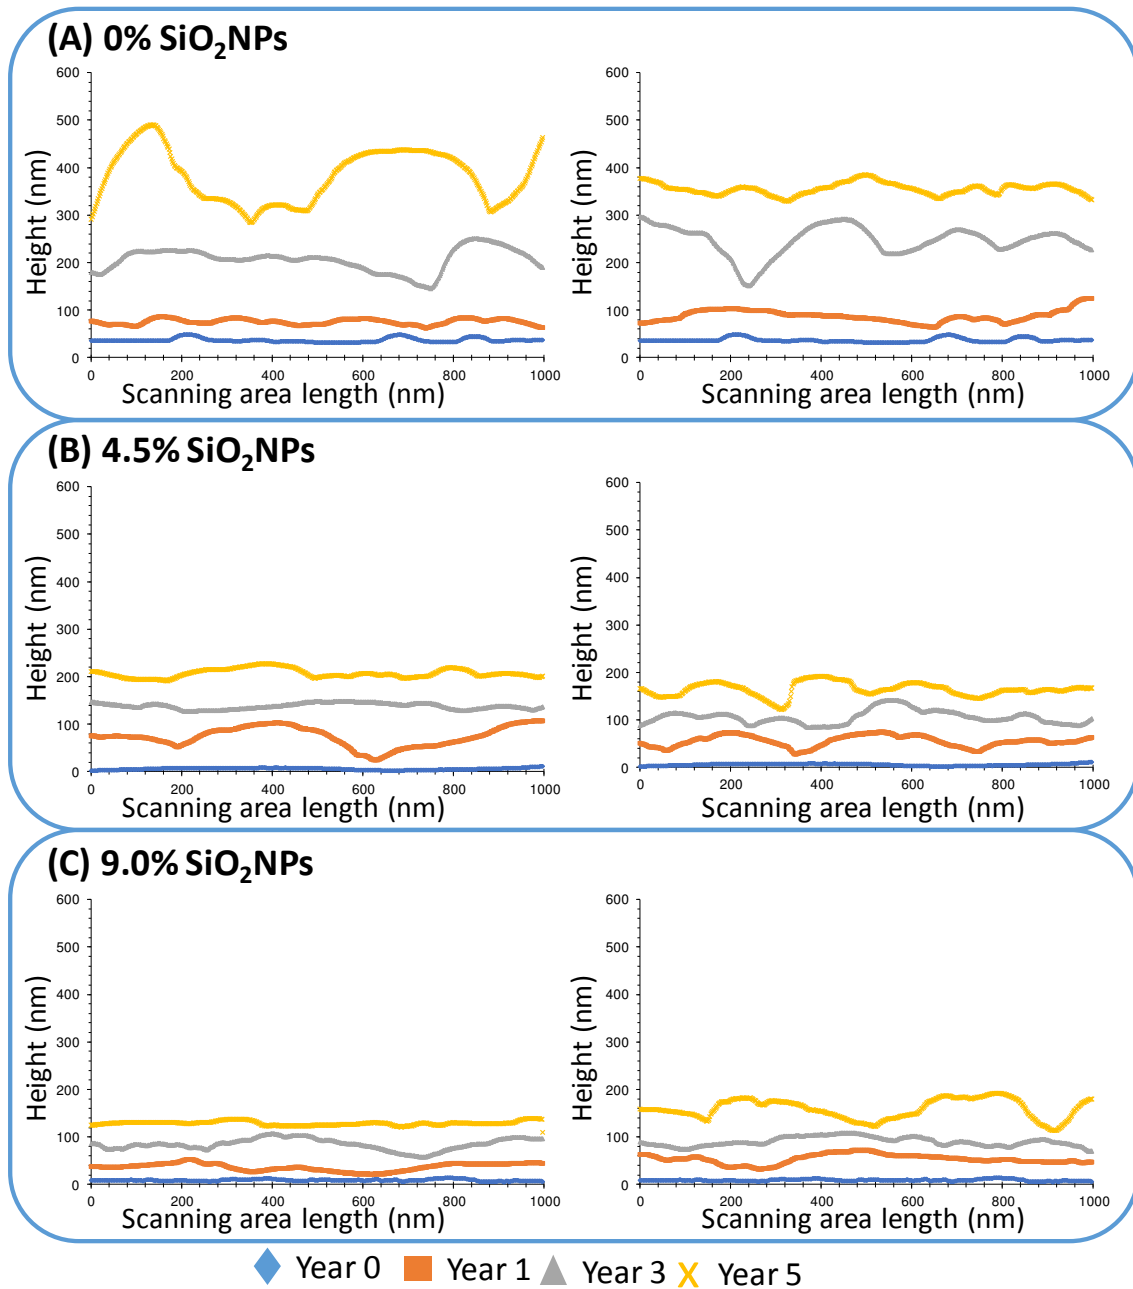

**S2 Fig. Surface roughness profile of pure polyester (0% SiO<sub>2</sub>NPs) and polyester composite coatings (4.5% and 9% SiO<sub>2</sub>NPs) on steel substrata under subtropical and tropical climate from year 0 to year 5. Corresponding surface profiles of atomic force micrographs (Fig. 1) showing the change in surface nanotopography of (A) 0% SiO<sub>2</sub>NPs, (B) 4.5% SiO<sub>2</sub>NPs, and 9% SiO<sub>2</sub>NPs after the 5-year exposure to sub-tropical and tropical climates.**
