# Supplementary material for: Synchrotron macro ATR-FTIR microspectroscopic analysis of silica nanoparticle-embedded polyester coated steel surfaces subjected to prolonged UV and humidity exposure
Source: PubMed Central journal article supplement (PMC5734741; doi:10.1371/journal.pone.0188345), 2017-12-18
Supplement: pone.0188345.s003.pdf [file pone.0188345.s003.pdf]

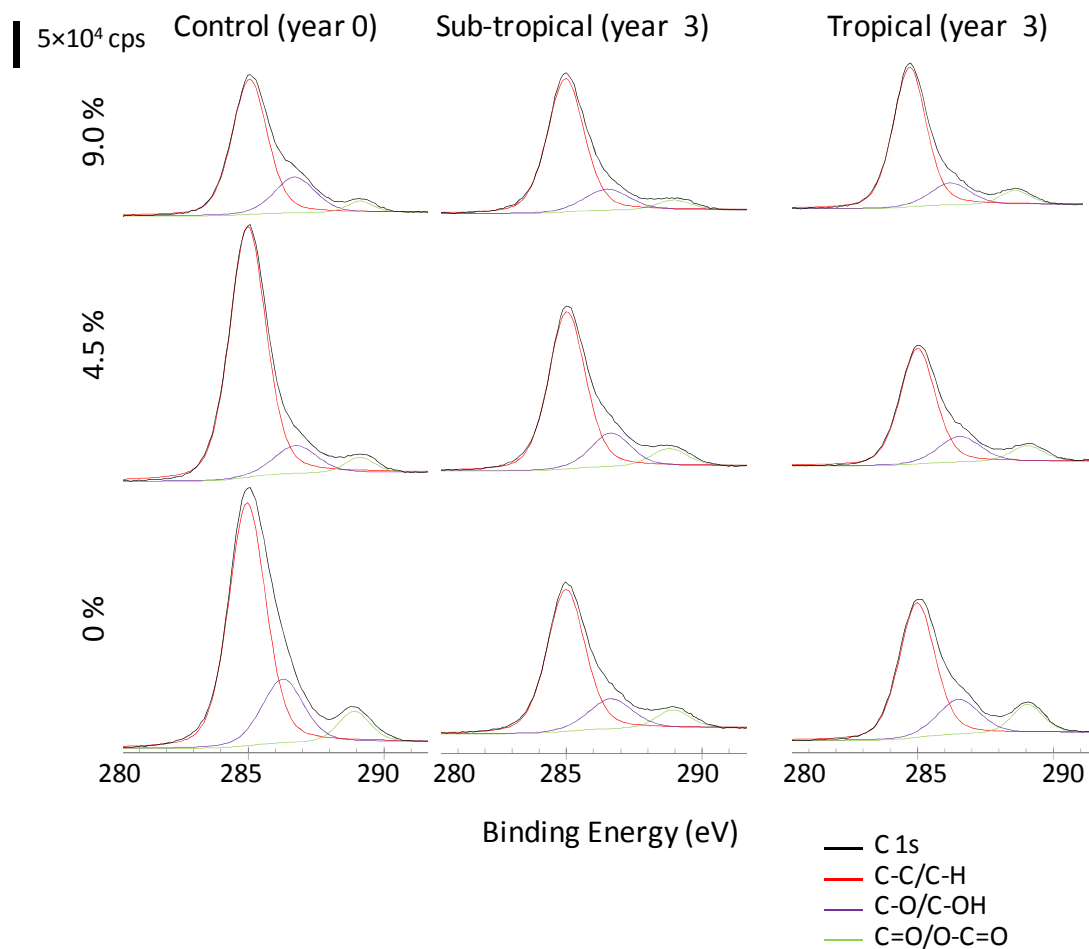

**S3 Fig. Deconvolution analyses of XPS C 1s high resolution spectra of pure polyester (0% SiO<sub>2</sub>NPs) and polyester composite coatings (4.5% and 9% SiO<sub>2</sub>NPs) on steel substrata under sub-tropical and tropical climates after 3 years of environmental exposure.**
