# Supplementary material for: Synchrotron macro ATR-FTIR microspectroscopic analysis of silica nanoparticle-embedded polyester coated steel surfaces subjected to prolonged UV and humidity exposure
Source: PubMed Central journal article supplement (PMC5734741; doi:10.1371/journal.pone.0188345), 2017-12-18
Supplement: pone.0188345.s005.pdf [file pone.0188345.s005.pdf]

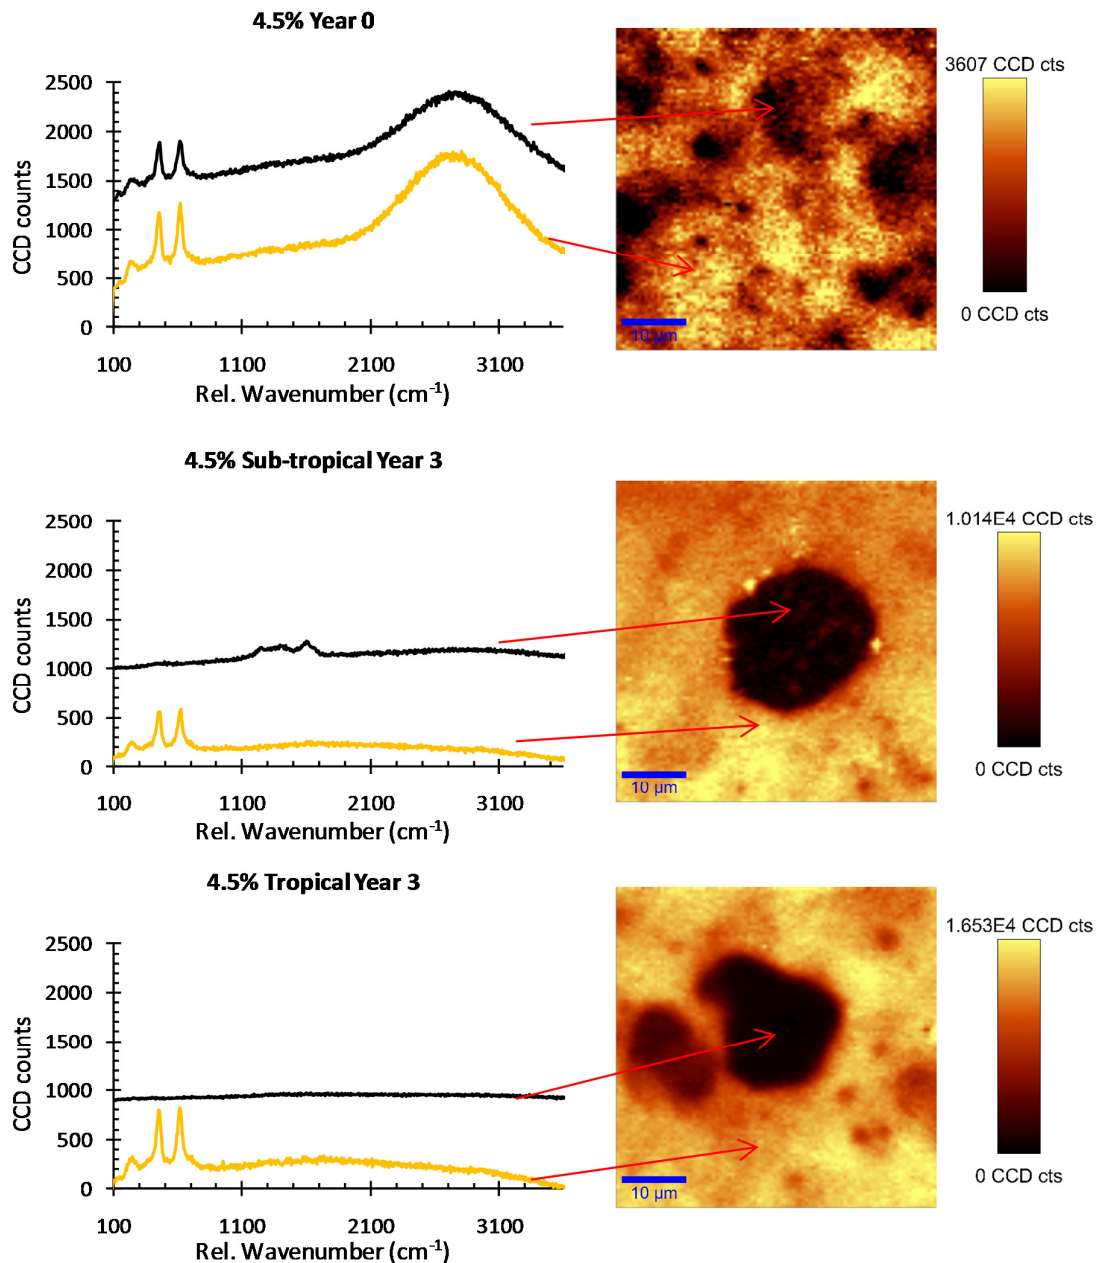

**S5 Fig. Representative Raman microspectroscopic spectra (*left*) and their corresponding Raman images based on integrated intensities in the range of 100-700 cm<sup>-1</sup> (*right*), observed for 4.5% SiO<sub>2</sub>NPs-embedded polyester composite coatings before and after 3 years of environmental exposure in sub-tropical and tropical climates (from *top* to *bottom*). Note that the representative Raman spectra were extracted from the locations indicated by arrows on the corresponding images.**
